1 Early outcomes of a large four-year MDMPH program: Results of a cross sectional survey of  
2 graduates (from three cohorts)

3

4

5 Julia Belkowitz<sup>1\*</sup>, Sabrina Payoute<sup>2</sup>, Gauri Agarwal<sup>3</sup>, Daniel Lichtstein<sup>3</sup>, Roderick King<sup>4</sup>, Shirin  
6 Shafazand<sup>3</sup>, Latha Chandran<sup>5</sup>

7

8 <sup>1</sup> Department of Pediatrics, University of Miami Miller School of Medicine, Miami, Florida,  
9 United States of America

10 <sup>2</sup> Former student Department of Public Health, University of Miami School of Medicine, Miami,  
11 Florida, United States of America

12 <sup>3</sup> Department of Medicine, University of Miami Miller School of Medicine, Miami, Florida,  
13 United States of America

14 <sup>4</sup>University of Maryland Medical System, Baltimore, Maryland, United States of America

15 Formerly Department of Public Health, University of Miami Miller School of Medicine, Miami,  
16 Florida, United States of America

17 <sup>5</sup> Department of Medical Education, University of Miami Miller School of Medicine, Miami,  
18 Florida, United States of America

19

20 \*Corresponding author

21 Email: [jbelkowitz2@med.miami.edu](mailto:jbelkowitz2@med.miami.edu) (JB)

## 23 **Abstract**

24 To address the public health needs of the 21<sup>st</sup> century, the University of Miami Miller  
25 School of Medicine implemented a four-year MD/ MPH program in 2011 with a mission to  
26 graduate public health physician leaders. The first cohort of students graduated in 2015. In the  
27 summer of 2020, a survey was sent to graduates to gather information on their early career  
28 involvement in the areas of leadership, research, and public health. In addition to several  
29 multiple-choice questions, the survey included an open-ended question on the impact of public  
30 health training in their careers. Content analysis was used to analyze the responses to the open-  
31 ended question. Eighty-two graduates completed the survey; 80 of whom had participated in  
32 residency training. Forty-nine (61%) joined a residency in a primary care field. Many graduates  
33 had leadership roles in their early careers, including 35 (44%) who were selected as chief  
34 residents. Fifty-seven (71%) participated in research, most commonly in quality improvement  
35 (40, 50%), clinical (34, 43%) and community based (19, 24%). Over one third (30, 38%) chose  
36 to do work in public health during residency.

37 Themes that emerged regarding the impact of public health training on their careers were:  
38 1) Shift in perspective, 2) Value of specific skills related to public health, 3) Steppingstone for  
39 professional opportunities 4) Focus on health disparities, social determinants, and inadequacies  
40 of the healthcare system, 5) Status as leaders and mentors for peers, and 6) Self-efficacy during  
41 the pandemic. Graduates self-reported significant commitment and involvement in leadership,  
42 research, and public health as well as towards addressing some of our most pressing public  
43 health needs. Although long-term career outcomes need to be determined over time, currently  
44 graduates report significant benefits of their public health training for their professional  
45 outcomes.

## 46 **Introduction**

47 It is imperative that the US create a workforce that includes physicians trained in public  
48 health who have skills and competencies to address health issues beyond the individual patient to  
49 those involving the community and population. In 2007, the Institute of Medicine made a call to  
50 enhance public health training among physicians through multiple avenues, including formal  
51 degree programs[1]. The COVID-19 pandemic with its associated morbidity, mortality, and  
52 strain on our health system has highlighted the importance of social determinants of health and  
53 public health infrastructure in ensuring the health of our nation. Physicians who are trained in  
54 population and public health sciences play a valuable role in leading a responsive and  
55 transformative health system.

56 Over 80 medical schools currently offer opportunities for MPH training for their students,  
57 with most requiring a fifth year of training[2]. The number of programs has been increasing over  
58 the past decades, with a total of 822 graduates of combined MD/ MPH programs between 2007-  
59 2012 and 1,978 students who graduated between 2014-2019 [3,4].

60 MD/ MPH students self-reported greater levels of leadership, service and research as medical  
61 students as compared with MD only or other dual degree peers in a 2020 study reporting  
62 outcomes from a self-reported database of over 18,000 senior medical students [5]. Those  
63 evaluating career intentions and residency match outcomes comparing MD/ MPH program  
64 graduates with MD or other combined degree programs have found that MD/ MPH students are  
65 more likely to match in primary care specialties than peers [3,5,6] Krousel-Wood et al surveyed  
66 graduates who received public health training from one institution 10- 20 years post-graduation  
67 and found that those with an MPH were more likely to be employed in academia, primary care,

68 and/ or public health and were more likely to conduct research [7]. However, more detailed  
69 understanding of how graduates from other institutions focus their careers in public health,  
70 community service, research and leadership are needed, and no studies provide insight into the  
71 perceived impact on such training from the graduates themselves.

72 In 2011, with a goal of graduating public health physician leaders, the MD/MPH program  
73 at the University of Miami Miller School of Medicine (UMMSM) began enrolling yearly cohorts  
74 of about 50 students, thereby making it the largest such program in the country [4]. This cohort  
75 completes both degrees within the traditional four years of training in medical school through  
76 integration of both the medical school and Master of Public Health curricula. The program is  
77 designed to provide students with the academic knowledge and skills, as well as the clinical and  
78 public health experience, to improve the health of populations, especially those most vulnerable  
79 and underserved. The first cohort graduated in 2015, and there have been 328 MD/ MPH  
80 graduates of our program between 2015-2021. The purpose of this study is to describe the early  
81 career outcomes of the graduates of the UMMSM four-year MD/ MPH program in the  
82 graduating classes of 2015-2017 specifically related to their continued engagement in leadership  
83 roles, research, and public health after graduation.

84

## 85 **Methods**

### 86 **Study design and participants**

87 All graduates from the first three cohorts of the UMMSM MD/ MPH (UMM) program  
88 were eligible to participate in this cross-sectional survey. All eligible graduates for whom email

89 addresses were available (130/142) were invited to participate in the online survey. The  
90 UMMSM Institutional Review Board approved this study (Protocol #20191104).

## 91 **Measures**

92 Survey items were selected or adapted from surveys available through the American  
93 Association of Medical Colleges (AAMC) and other national organizations and finalized by this  
94 team of investigators[8,9,10,11,12]. Demographic data was collected and included gender  
95 identity, marital status, number of dependents, and specialty of residency training as per the  
96 AAMC Graduation Questionnaire [8]. Race and ethnicity were defined according to the federal  
97 government definitions[9]. Types of residency training program was defined based on the  
98 AAMC Program Survey[10]. Graduates were also asked to identify age, graduation year and  
99 status of training in residency and fellowship (as applicable).

100 Questions about current workplace setting, were adapted from AAMC and American  
101 Academy of Pediatrics surveys [8,11,12]. Items regarding involvement in leadership, advocacy  
102 and public health were novel and included yes/ no or multiple responses with the opportunity for  
103 free text when graduates affirmed participation in a specific area (Table 1). The single open-  
104 ended question was “Please describe the impact of your public health education on your career.”

105 **Table 1. Survey items for leadership, research, and public health**

| <b>Leadership</b>                                                                         |
|-------------------------------------------------------------------------------------------|
| Were/ are you selected to be a chief resident?                                            |
| Other than chief resident, did you/ do you hold other leadership positions as a resident? |
| Do you hold/ have you held leadership positions in your specialty organization?           |
| Do you hold/ have you held other state or national leadership positions?                  |
| <b>Research</b>                                                                           |

|                                                                                                          |
|----------------------------------------------------------------------------------------------------------|
| Do you participate in research activities?                                                               |
| Have you applied for external funding (federal, foundation grants)?                                      |
| Have you received any awards?                                                                            |
| <b>Public Health</b>                                                                                     |
| Were you required to do any public health work during your residency training?                           |
| Outside of what was required, did you elect to do any public health work during your residency training? |
| What is the best description of your current work status?                                                |
| What is the best description of your current place of practice?                                          |
| Please indicate the setting in which you currently work.                                                 |
| Do you work in a primarily underserved area?                                                             |
| Please describe the impact of your public health education on your career.                               |

106

107

## 108 **Data analysis**

109           Survey data was collected using Redcap v11.2.2, de-identified for analysis, and reported  
110 using tabular counts and descriptive statistics. Free text responses were independently  
111 summarized into categories by three investigators (JB, SP, GA) and the group discussed to  
112 achieve consensus when there was initial disagreement about the classification.

113           Qualitative analysis was done manually for the one open-ended question using  
114 conventional content analysis. Two investigators (JB and SP) independently reviewed the  
115 responses and together created a codebook summarizing the definition of the codes and  
116 explanation for how to apply the codes during the analysis. Three investigators (JB, SP and GA)  
117 then independently reviewed the free responses and applied the codes to the collected data. This  
118 team then consolidated the responses into broader categories and used those categories to  
119 identify themes that illustrated the perspectives of the participants about their experiences.

120

## 121 Results

### 122 Demographics characteristics

123 Of the 142 eligible participants, we had contact information on 130 alumni who were  
124 then invited to participate. This included 47/48 from the class of 2015 (98%), 45/48 from the  
125 class of 2016 (94%), and 38/46 (83%) from the class of 2017. A total of 82 alumni from the  
126 three cohorts responded to the questionnaire resulting in a 63% response rate. Demographic  
127 characteristics at enrollment in the survey are summarized in Table 2. Females represented 54%  
128 of survey respondents (44). Among survey respondents, 62% (51) self-identified as white, 4%  
129 (3) Black or African American, 13% (11) Asian, 11% (9) Hispanic, or Latino, or of Spanish  
130 origin, 6% multiracial (5), and 4% other race (3). The three cohorts were represented fairly  
131 evenly among the respondents. Seventy three percent (60) of respondents claimed zero  
132 dependents. Regarding marital status, 55% (45) of survey respondents were married. The  
133 average respondent age was 31.6 +/- 1.8 years (range 28 - 36 years).

134 **Table 2. Demographic characteristics of participants**

|                                        | Total (n = 82)   |
|----------------------------------------|------------------|
|                                        | Number (percent) |
| <b>Gender</b>                          |                  |
| Female                                 | 44 (53.7)        |
| Male                                   | 38 (46.3)        |
| <b>Race and Ethnicity</b>              |                  |
| Asian                                  | 11 (13.4)        |
| Black or African American              | 3 (3.7)          |
| Hispanic, Latino, or of Spanish origin | 9 (11.0)         |
| Multiple Race and Ethnicity            | 5 (6.1)          |

|                                                         |           |
|---------------------------------------------------------|-----------|
| White                                                   | 51 (62.2) |
| Other                                                   | 3 (3.7)   |
| <b>Academic Year of Graduation</b>                      |           |
| 2015                                                    | 31 (37.8) |
| 2016                                                    | 29 (35.4) |
| 2017                                                    | 22 (26.8) |
| <b>No. of Dependents (not including spouse/partner)</b> |           |
| 0                                                       | 60 (73.2) |
| 1                                                       | 14 (17.1) |
| > 1                                                     | 8 (9.8)   |
| <b>Marital Status</b>                                   |           |
| Single (never legally married)                          | 32 (39.0) |
| Legally married                                         | 45 (54.9) |
| Other                                                   | 5 (6.1)   |
| <b>Age at time of survey, years</b>                     |           |
| Mean (SD): 31.6 (1.8)                                   |           |
| Range: (28 - 36)                                        |           |

135

## 136 **Residency and fellowship training**

137           Of the total of 82 respondents, only 80 (98%) who participated in residency or fellowship  
138 training are included in the analysis. Of these, 35 participants had completed their graduate  
139 medical education. Details regarding status of training and specialty choice are depicted in Fig  
140 1. Eighteen (23%) participated in a specialized track for residency training. Graduates in a  
141 specialized residency track reported to have participated in pathways such as Advocacy/  
142 Community Health (5), Primary Care (4), Global Health (3), and others.

143

144 **Figure 1: UMMSM MD/ MPH Alumni training status**

145



## 146 Leadership, research, and public health

147 Many MD-MPH program graduates reported that they were appointed to a leadership  
 148 position. Leadership characteristics are summarized in Table 3. Thirty-five (44%) were selected  
 149 as chief residents. Thirty-eight (48%) listed other leadership activities held as a resident, 12  
 150 (15%) held leadership positions in their specialty specific organizations, and ten (12%) have held  
 151 other state/national leadership positions. Categories of participation included leadership roles  
 152 within their residency program or representing their residency program such as curriculum  
 153 committee, Graduate Medical Education Committee representative (n=26); leadership within  
 154 their specialty specific organization (ex. national delegate or committee chair), (n=18);  
 155 leadership in research, patient safety, and/ or quality improvement (n=11); leadership regarding  
 156 specific professional domains in the areas of diversity, wellness, and interprofessional  
 157 collaboration (e.g. Diversity in Equity and Inclusion Committee), (n=10); leadership in  
 158 community-based activities (e.g.. Community Health Committee) (n=5); and leadership related  
 159 to clinical algorithms or skills development (eg. skills lab instructor) (n=4).

160 **Table 3: Leadership, research, and public health post medical school graduation**

| Domain            | Sample participation types                                         | Participation Overall (n=80) | Participation among those who have completed GME training (n=35) |
|-------------------|--------------------------------------------------------------------|------------------------------|------------------------------------------------------------------|
| <b>Leadership</b> |                                                                    | N (percent*)                 | N (percent*)                                                     |
|                   | Selected as chief resident                                         | 35 (43.8)                    | 15 (42.9)                                                        |
|                   | Held other leadership activities as a resident                     | 38 (47.5)                    | 16 (45.7)                                                        |
|                   | Held leadership positions in their specialty specific organization | 12 (15.0)                    | 5 (14.3)                                                         |
|                   | Held other state/national leadership positions                     | 10 (12.5)                    | 5 (14.3)                                                         |
|                   | Received an Award                                                  | 42 (52.5)                    | 19 (54.3)                                                        |

|                      |                                                                                       |           |           |
|----------------------|---------------------------------------------------------------------------------------|-----------|-----------|
| <b>Research</b>      |                                                                                       |           |           |
|                      | Participated in Research                                                              | 57 (71.3) | 19 (54.3) |
|                      | **Research Type:                                                                      |           |           |
|                      | Quality improvement projects                                                          | 40 (50.0) | 14 (40.0) |
|                      | Investigator initiated clinical research                                              | 34 (42.5) | 10 (28.9) |
|                      | Community-based research                                                              | 19 (23.8) | 7 (20.0)  |
|                      | Translational research                                                                | 14 (17.5) | 2 (5.7)   |
|                      | Basic science research                                                                | 6 (7.5)   | 2 (5.7)   |
|                      | Industry sponsored trials                                                             | 3 (3.8)   | 1 (2.9)   |
|                      | Applied for external grant funding                                                    | 11 (13.8) | 5 (14.3)  |
|                      | **Research grant funding support:                                                     |           |           |
|                      | Federal (DOD, NIH)                                                                    | 2 (2.5)   | 2 (5.7)   |
|                      | Foundation grants                                                                     | 7 (8.8)   | 2 (5.7)   |
|                      | Academic Society grants                                                               | 6 (7.5)   | 4 (11.4)  |
|                      | Industry sponsored educational grants                                                 | 1 (1.3)   | 0 (0.0)   |
| <b>Public Health</b> |                                                                                       |           |           |
|                      | Required to do public health work during residency training                           |           |           |
|                      | Yes                                                                                   | 8 (10.0)  | 3 (8.6)   |
|                      | No                                                                                    | 72 (90.0) | 32 (91.4) |
|                      | Chose to do public health work during residency training outside of what was required | 30 (37.5) | 12 (34.3) |
|                      | Description of current work status                                                    |           |           |
|                      | Direct healthcare delivery only                                                       | 69 (86.3) | 29 (82.9) |
|                      | Both medicine and public health/ administration                                       | 11 (13.8) | 6 (17.1)  |
|                      | Description of current place of practice                                              |           |           |
|                      | Military                                                                              | 4 (5.0)   | 4 (11.4)  |
|                      | Academic position                                                                     | 35 (43.8) | 11 (31.4) |
|                      | Solo or group practice                                                                | 9 (11.3)  | 8 (22.9)  |
|                      | HMO (staff model)                                                                     | 2 (2.5)   | 1 (2.9)   |
|                      | Non-government hospital                                                               | 9 (11.3)  | 7 (20.0)  |
|                      | Government hospital                                                                   | 2 (2.5)   | 0 (0.0)   |
|                      | Non-profit community health centers                                                   | 1 (1.3)   | 1 (2.9)   |
|                      | ***Other                                                                              | 18 (22.5) | 3 (8.6)   |

|  |                                          |           |           |
|--|------------------------------------------|-----------|-----------|
|  | ****Setting of current work              |           |           |
|  | Large City (500,000 or more)             | 39 (48.8) | 18 (51.4) |
|  | Suburb of a large city                   | 4 (5.0)   | 4 (11.4)  |
|  | Moderate City (50,000- 500,000)          | 16 (20.0) | 12 (34.3) |
|  | Small City (10,000-50,000)               | 1 (1.3)   | 0 (0.0)   |
|  | Rural/ Unincorporated Area               | 1 (1.3)   | 1 (2.9)   |
|  | ****Work in a primarily underserved area | 31 (51.6) | 22 (62.9) |

161 \*Percentages may not add up to 100% due to rounding

162 \*\*Note: Percentage do not add up to 100 due to participants being able to select more than one  
163 type

164 \*\*\*Other: includes free-standing ambulatory care, surgical, or emergency care centers

165 \*\*\*\*Only participants who completed residency training (n=61)

166

167 Over half of those who had undergone residency training (n= 42, 53%) reported receiving  
168 an award professionally. Categories included awards highlighting their excellence as a  
169 resident/clinical skills from either the residency program or the specialty society (n=33); awards  
170 for research/ scholarship or patient safety/ quality improvement (n=21); awards for teaching/  
171 humanism/ AOA (n=16); and other awards (n=12).

172 Fifty-seven (71%) MD-MPH program alumni reported participation in research. Research  
173 characteristics are summarized in Table 3. Forty (50%) participated in quality improvement  
174 projects, 34 (43%), participated in investigator initiated clinical research, 19 (24%) in  
175 community-based research, 14 (18%) in translational research, 6 (8%) in basic science research,  
176 3 (4%) in industry sponsored trials. Among the 57 that participated in research, 11 (14%)  
177 successfully received research grant support from sources including federal agencies (2, 3%),  
178 foundation (7, 9%), academic society (6, 8%), and industry sponsored grant funding (1, 1%).

179 Results regarding the graduates’ involvement in public health are summarized in Table 3.  
 180 Over a third of the respondents, 30 (38%) voluntarily chose to participate in public health work  
 181 during residency, outside of what was required of them. Overall, categories of the public health  
 182 related work were included Advocacy/ leadership (n=14), Research/ patient safety/ quality  
 183 improvement (n=12), community based (n=10), global health (n=8), clinically related (n=6),  
 184 teaching (n=5).

185 Analysis of the responses to the question to “describe the impact of your public health  
 186 education on your career” revealed six broad themes: 1) Shift in perspective, 2) Value of  
 187 specific skills related to public health, 3) Stepping stone for professional opportunities 4) Focus  
 188 on health disparities, social determinants and inadequacies of the healthcare system, 5) Status as  
 189 leaders and mentors for peers, and 6) Self-efficacy during the pandemic. Further details are  
 190 described in Table 4.

191

192 **Table 4: Qualitative analysis results for impact of public health training**

193

| Theme                | Description                                       | Representative Quotation(s)                                                                                                                                                                                                                                                                                                                                                                                                                                                                                                                                       |
|----------------------|---------------------------------------------------|-------------------------------------------------------------------------------------------------------------------------------------------------------------------------------------------------------------------------------------------------------------------------------------------------------------------------------------------------------------------------------------------------------------------------------------------------------------------------------------------------------------------------------------------------------------------|
| Shift in Perspective | Overall career and approach to clinical medicine. | <ul style="list-style-type: none"> <li>• “My public health education has shaped the way I practice medicine in many ways. Every time I see a patient I try and get to the root cause of their problem(s),”</li> <li>• “Public health has formed the way I view medicine. My perspective is different because of my public health training. I view things from a systemic perspective in addition to an individual patient perspective, and try to be cognizant of systemic issues which prevent adequate health in the community in which I practice.”</li> </ul> |

|                                                   |                                                                                                  |                                                                                                                                                                                                                                                                                                                                                                                                                                                                                                                                                                                                                                                                                                                             |
|---------------------------------------------------|--------------------------------------------------------------------------------------------------|-----------------------------------------------------------------------------------------------------------------------------------------------------------------------------------------------------------------------------------------------------------------------------------------------------------------------------------------------------------------------------------------------------------------------------------------------------------------------------------------------------------------------------------------------------------------------------------------------------------------------------------------------------------------------------------------------------------------------------|
|                                                   | Direct impact on their personal interactions with patients                                       | <ul style="list-style-type: none"> <li>• “Changes the way I treat patients. Helps me connect on a deeper level with people from all backgrounds,”</li> </ul>                                                                                                                                                                                                                                                                                                                                                                                                                                                                                                                                                                |
|                                                   | Related to their own lives                                                                       | <ul style="list-style-type: none"> <li>• “My public health education taught me to better understand why underserved populations have worse health outcomes, which has inspired me to actively work to eliminate this health outcome gap by working on implicit personal level and system level biases in the way I practice medicine and live my life.”</li> </ul>                                                                                                                                                                                                                                                                                                                                                          |
| Value of specific skills related to public health | Content from the formal public health curriculum as important for their current day to day work. | <ul style="list-style-type: none"> <li>• “My [public health] education has given me the ability to easily critically appraise medical literature and understand the meaning of biostatistics”</li> <li>• “The biggest impact I have found is how my training has helped me interact with hospital administration to improve patient care in both the inpatient and outpatient center.”</li> </ul>                                                                                                                                                                                                                                                                                                                           |
|                                                   | Capability with research in a variety of domains                                                 | <ul style="list-style-type: none"> <li>• “The coursework of the MPH degree has proven useful in clinical research, project proposals, grant applications, and publication in peer-reviewed journal”</li> <li>• “I gained substantial research and statistical training through my public health education that I continue to apply to my current research in high-risk women and infectious disease”</li> <li>• “My public health background has encouraged me to push for or find a solution to increase minority/ underserved population inclusion in cancer clinical trials. I initiated a retrospective study based on rising costs of [disease management] to find targeted areas to help with this issue.”</li> </ul> |

|                                                                                             |                                                                                  |                                                                                                                                                                                                                                                                                                                                                                                                                                                                                                                                                                                                                                                                                                                                         |
|---------------------------------------------------------------------------------------------|----------------------------------------------------------------------------------|-----------------------------------------------------------------------------------------------------------------------------------------------------------------------------------------------------------------------------------------------------------------------------------------------------------------------------------------------------------------------------------------------------------------------------------------------------------------------------------------------------------------------------------------------------------------------------------------------------------------------------------------------------------------------------------------------------------------------------------------|
| Stepping stone for professional opportunities                                               | Workload demands limited their opportunity to fully participate in public health | <ul style="list-style-type: none"> <li>• “While much of residency has been taken up with clinical duties, I’m still hoping to pursue a research focus in healthcare disparities as an attending.”</li> </ul>                                                                                                                                                                                                                                                                                                                                                                                                                                                                                                                            |
|                                                                                             | Access and meaningful contribution to positions                                  | <ul style="list-style-type: none"> <li>• “My training also made me better suited to function as a leader and community liaison for the [community-based program].”</li> <li>• “My public health education has been incredibly important for my career. It has allowed me to understand public health and to pursue [professional opportunity] which has been an amazing experience.”</li> </ul>                                                                                                                                                                                                                                                                                                                                         |
| Focus on health disparities, social determinants and inadequacies of the healthcare system. | Integration of social determinants into daily work and approach to healthcare    | <ul style="list-style-type: none"> <li>• “It created a strong foundation of the importance of population health and understanding how social determinants have a huge impact on individuals health and further more on communities”</li> <li>• “Aspects of my clinical research and quality improvement projects and seek to improve healthcare systems and delivery of care within our [clinic]. I feel strongly that it is my public health background that has provided the skills and knowledge to carry all of this out...”</li> <li>• “Exposed me to working collaboratively and leading groups around population- specific priorities and opportunities for improvement in healthcare delivery and health promotion.”</li> </ul> |
|                                                                                             | Working with vulnerable populations                                              | <ul style="list-style-type: none"> <li>• “I work at [county’s] public safety net hospital and am committed to a career in service to underserved populations.”</li> </ul>                                                                                                                                                                                                                                                                                                                                                                                                                                                                                                                                                               |
| Status as leaders and mentors for peers                                                     | Viewed as leaders in their residency/ work because of their specialized training | <ul style="list-style-type: none"> <li>• “Set me apart from my peers as being uniquely qualified in healthcare systems- thinking and related leadership roles”</li> <li>• “My co-residents often come to me for help with their quality improvement projects and</li> </ul>                                                                                                                                                                                                                                                                                                                                                                                                                                                             |

|                                   |                                                                                                   |                                                                                                                                                                                        |
|-----------------------------------|---------------------------------------------------------------------------------------------------|----------------------------------------------------------------------------------------------------------------------------------------------------------------------------------------|
|                                   |                                                                                                   | questions regarding interpreting the medical literature because they know that I have/had public health and research training.”                                                        |
|                                   | Teaching was identified as an important aspect of this status                                     | <ul style="list-style-type: none"> <li>• “...Also, as a public health physician I try and educate my colleagues and patients on the importance of public health.”</li> </ul>           |
|                                   | Advocates for their patient population                                                            | <ul style="list-style-type: none"> <li>• “...it pushed me to strength my skills in advocating for my patient and finding the right resources for them.”</li> </ul>                     |
| Self-efficacy during the pandemic | Felt especially equipped to be working in the healthcare system as the COVID-19 pandemic emerged. | <ul style="list-style-type: none"> <li>• “It has also helped me to understand the COVID pandemic at the epidemiologic and socio-political levels, even from very early on.”</li> </ul> |

194

195

## 196 Discussion

197 This study is the first to examine early career outcomes and qualitative impact from a  
 198 large cohort of MD/ MPH students. Our study results indicate that the graduates of the  
 199 UMMSM dual degree MD/MPH program are utilizing their public health education and continue  
 200 to remain committed to leadership, research, and public health several years after graduation.

201 The graduates’ choices of post-graduate programs (residencies) indicated that over 50% of them  
 202 chose primary care specialties or combined primary programs that included primary care.

203 Though the definition of primary care varies in the literature, this team of investigators elected to  
 204 define primary care to include family medicine, internal medicine, pediatrics and obstetrics and  
 205 gynecology, consistent with the United States Health Resources & Service Administration  
 206 definitions [7,13,14,15]. The tendency towards MD/ MPH graduates to more heavily choose  
 207 primary care residencies is consistent with graduate intentions and match outcomes at other  
 208 institutions [3,5,6]. In a long-term study which followed graduates from one institution’s MD/

209 MPH program for 10- 20 years post-graduation, members of their MD/ MPH cohort were more  
210 likely to practice general primary care [7]. It remains to be seen if our graduates will indeed  
211 follow a similar path as, 21 (43%), of our graduates who initially entered primary care related  
212 residencies ultimately participated in fellowship training. Future studies investigating the long-  
213 term career pathways will be required to better understand their ultimate career trajectories.

214         Nonetheless, the mission of the dual degree program at our institution is not rooted in  
215 training primary care physicians. Rather, the stated mission is to develop public health physician  
216 leaders, regardless of specialty choice [16]. The results of our study indicate that they are indeed  
217 beginning to build a foundation to become public health leaders based upon their described  
218 involvement in leadership and research experiences. Forty four percent of the program's alumni  
219 were selected as chief residents, and 48% held some other leadership role as a resident outside of  
220 serving as chief. Seventy one percent of the graduates participated in research since graduation,  
221 with 50% involved in quality improvement related work and 24% in community-based research.  
222 Narrative comments also supported their trajectory towards becoming public health leaders  
223 through their self- identified positions in their residency program as role models and teachers.  
224 Graduates of other MD/ MPH programs are more likely to describe intentions of working in  
225 academic medicine, healthcare administration and/or state and federal administration [3].  
226 Christensten et al described residency characteristics comparing MD/ MPH students with other  
227 dual degree or MD only graduates and found that MD/ MPH students had significantly more  
228 participation in Gold Humanism Honor Society membership, research related experiences,  
229 leadership experiences, volunteer experiences during medical school [5]. We intend to follow  
230 this and future cohorts over time to better describe the ultimate career outcomes of our graduates.



231 An important question is whether public health training in medical schools will lead to an  
232 expansion of the workforce of public health professionals. Emerging findings from this study and  
233 others seem to support that it will. More than one third (38%) of the graduates voluntarily  
234 elected to participate in public health endeavors during residency above and beyond what was  
235 required in their respective curricula, despite the rigorous demands of their schedules and  
236 residency responsibilities. Perhaps most meaningful in evaluating the impact of public health  
237 education (MPH) on the careers of the respondents were the themes that emerged from the rich  
238 narrative comments about the impact of the program's public health training on their careers. Not  
239 surprisingly, students appreciated the specific public health skills such as appraisal of the  
240 literature and research. Others have surveyed medical student participants of their MPH training  
241 programs and similarly reported improved skills in critical appraisal of the literature and research  
242 skills, as well as a commitment towards underserved populations, policy and global health  
243 [13,17]. A national study of a cohort of 822 MD MPH graduates found that MD MPH program  
244 graduates were more likely to report altruism as a factor in their career choice than MD only  
245 graduates [3]. These findings are also highlighted in the comments from our study participants in  
246 themes that emerged regarding dedication towards addressing social determinants and service  
247 towards vulnerable populations, among others.

248 Limitations include that this data was self-reported using a survey that had not been  
249 formally validated. There is always a potential for self-selection bias given the methodology. It  
250 is also difficult to make predictions regarding the long-term involvement of study participants in  
251 leadership, research, and public health, and to determine this we plan to follow this and future  
252 cohort of our graduates to determine the level of their continued engagement these areas.

253           This study demonstrates that integrating a Master of Public Health curriculum into a four-  
254 year combined medical school program can lead to the successful development of a cohort of  
255 dedicated public health physician leaders. Though the full impact of this training cannot be  
256 measured for many years to come, it is encouraging to see the early career outcomes of  
257 MD/MPH trained physicians. Especially given the burgeoning public health crises resulting  
258 from the current pandemic, climate change, and other health needs around the world, it is the  
259 responsibility of the medical education community to continue to expand similar training  
260 programs that integrate the public health work force needs with the idealism and altruism that  
261 many students bring to their training.

262

## 263 **Acknowledgments**

264 The authors wish to thank Michael Maguire, MD, MPH for his support in providing contact  
265 information for alumni, Marta Bergez for providing data regarding the MD/ MPH cohort, and  
266 Anna Yabloch for her support in initial technical management of the survey.

267

## 268 **References**

- 269           1. Institute of Medicine 2007. Training Physicians for Public Health Careers. Washington,  
270 DC: The National Academies Press. <https://doi.org/10.17226/11915>.
- 271           2. American Association of Medical Colleges. Directory of MD-MPH Educational  
272 Opportunities website. [https://students-residents.aamc.org/applying-dual-degree-](https://students-residents.aamc.org/applying-dual-degree-programs/directory-md-mph-educational-opportunities)  
273 [programs/directory-md-mph-educational-opportunities](https://students-residents.aamc.org/applying-dual-degree-programs/directory-md-mph-educational-opportunities). Accessed May 5, 2021.
- 274           3. Andriole DA, Jeffe DB, Tai RH. Characteristics and Career Intentions of MD-MPH  
275 Program Graduates: A National Cohort Study. Public Health Rep. 2016 Jul-  
276 Aug;131(4):637-49. doi: 10.1177/0033354916662224. PMID: 27453612; PMCID:  
277 PMC4937129.
- 278           4. AAMC: Data Warehouse, APP\_BIO and STUDENT\_IND tables as of July 15, 2020.  
279 STUDENT\_IND last updated July 13, 2020, and APP\_BIO last updated October 22,  
280 2019.

- 281 5. Christensen BR, Becnel CM, Chan LP, Minetos PD, Clarke JF, Kahn MJ. A comparison  
282 of match outcomes between traditional medical degree and dual-degree applicants. PLOS  
283 One. 2020 Dec 18;15(12):e0244147. doi: 10.1371/journal.pone.0244147. PMID:  
284 33338062; PMCID: PMC7748145.
- 285 6. Taylor, Barbara S. MD, MS1; Mazurek, Paulina H. EdD2; Gutierrez, Stephanie3; Tyson,  
286 Joshua4; Futrell, Selina5; Jackson, Jeff EdD6; Hanson, Joshua MD, MPH7; Valerio,  
287 Melissa A. PhD, MPH8 Educational Outcomes of a 4-Year MD–MPH Dual-Degree  
288 Program, Academic Medicine: January 18, 2022 - Volume - Issue -  
289 doi: 10.1097/ACM.0000000000004603
- 290 7. Krousel-Wood M, He J, Booth M, Chen CS, Rice J, Kahn MJ, Maeshiro R, Whelton PK.  
291 Formal public health education and career outcomes of medical school graduates. PLOS  
292 One. 2012;7(6):e39020. doi: 10.1371/journal.pone.0039020. Epub 2012 Jun 20. PMID:  
293 22745699; PMCID: PMC3380037.
- 294 8. 2018 AAMC Medical School Graduation Questionnaire ([https://www.aamc.org/data-](https://www.aamc.org/data-reports/students-residents/report/graduation-questionnaire-gq)  
295 [reports/students-residents/report/graduation-questionnaire-gq](https://www.aamc.org/data-reports/students-residents/report/graduation-questionnaire-gq))
- 296 9. Office of Management and Budget. Standards for the Classification of Federal Data on  
297 Race and Ethnicity. Available at:  
298 [https://obamawhitehouse.archives.gov/omb/fedreg\\_race-ethnicity](https://obamawhitehouse.archives.gov/omb/fedreg_race-ethnicity)
- 299 10. 2016 AAMC Program Director Survey ([https://www.aamc.org/data-reports/students-](https://www.aamc.org/data-reports/students-residents/report/program-director-survey)  
300 [residents/report/program-director-survey](https://www.aamc.org/data-reports/students-residents/report/program-director-survey))
- 301 11. Adapted from the National GME Census ([https://www.aamc.org/data-reports/students-](https://www.aamc.org/data-reports/students-residents/report/gme-track)  
302 [residents/report/gme-track](https://www.aamc.org/data-reports/students-residents/report/gme-track))
- 303 12. AAP survey [https://www.aap.org/en-us/professional-resources/Research/Pages/PS43](https://www.aap.org/en-us/professional-resources/Research/Pages/PS43_Additional_Characteristics_of_Pediatricians.aspx)  
304 [Additional\\_Characteristics\\_of\\_Pediatricians.aspx](https://www.aap.org/en-us/professional-resources/Research/Pages/PS43_Additional_Characteristics_of_Pediatricians.aspx)
- 305 13. Stellman JM, Cohen S, Rosenfield A. Evaluation of a one-year Masters of Public Health  
306 program for medical students between their third and fourth years. Acad Med. 2008  
307 Apr;83(4):365-70. doi: 10.1097/01.ACM.0b013e318166af00. PMID: 18367897.
- 308 14. Health Center Program Terms and Definitions.  
309 <https://www.hrsa.gov/sites/default/files/grants/apply/assistance/Buckets/definitions.pdf>.  
310 Accessed October 10, 2021.
- 311 15. National Residency Matching Program. Results and Data 2021 Match.  
312 [https://mk0nrmp3oyqui6wqfm.kinstacdn.com/wp-content/uploads/2021/05/MRM-](https://mk0nrmp3oyqui6wqfm.kinstacdn.com/wp-content/uploads/2021/05/MRM-Results_and-Data_2021.pdf)  
313 [Results\\_and-Data\\_2021.pdf](https://mk0nrmp3oyqui6wqfm.kinstacdn.com/wp-content/uploads/2021/05/MRM-Results_and-Data_2021.pdf). Accessed October 10, 2021.
- 314 16. University of Miami Miller School of Medicine. MD MPH Program.  
315 <http://admissions.med.miami.edu/md-programs/md-mph-program>. Accessed October 5,  
316 2021.
- 317 17. Harris R, Kinsinger LS, Tolleson-Rinehart S, Viera AJ, Dent G. The MD-MPH program  
318 at the University of North Carolina at Chapel Hill. Acad Med. 2008 Apr;83(4):371-7. doi:  
319 10.1097/ACM.0b013e318166a848. PMID: 18367898.

**Figure 1: UMMSM MD/ MPH Alumni training status**

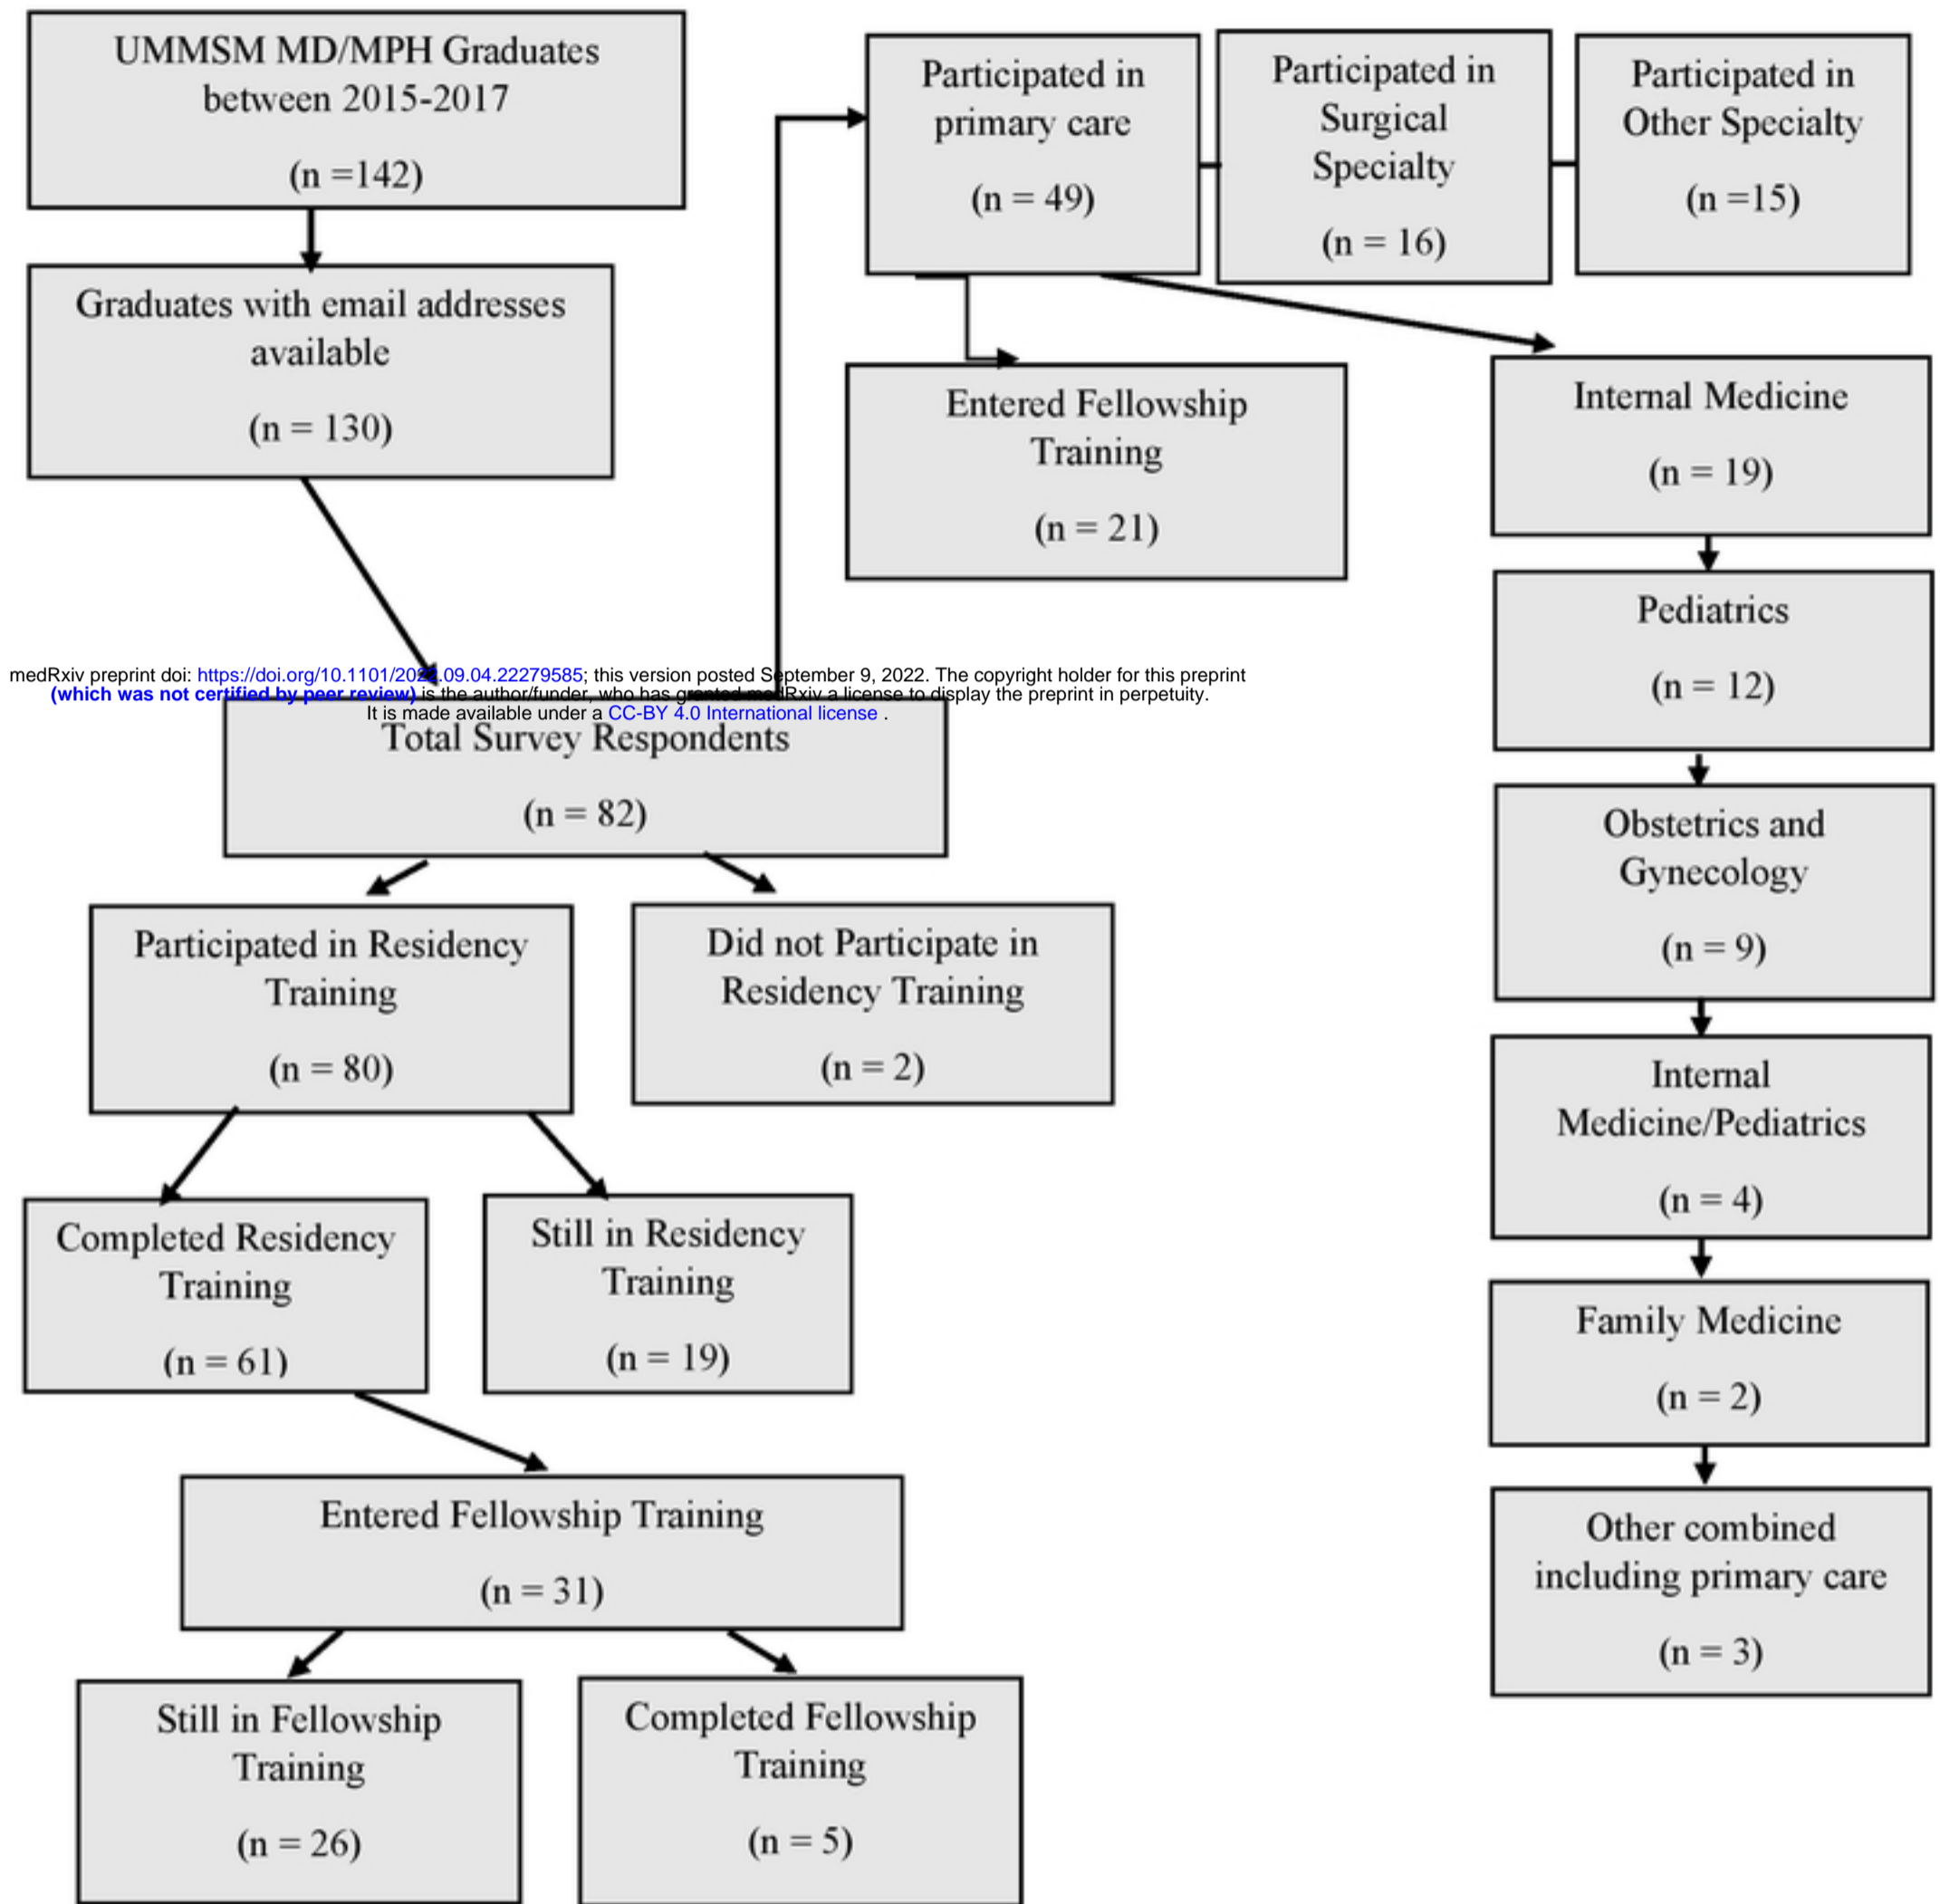

Source: https://www.medrxiv.org/content/10.1101/2022.09.04.22279585v1.full.pdf
